# Supplementary material for: Quantitative Characterization of the Filiform Mechanosensory Hair Array on the Cricket Cercus
Source: PLoS One. 2011 Nov 21;6(11):e27873. doi: 10.1371/journal.pone.0027873 (PMC3221685; doi:10.1371/journal.pone.0027873)
Supplement: Spreadsheet S1 — Spreadsheet containing all anatomical measurements used for Table 1 and Figures 8 , 9 , 10 , 11 , 12 , and 13 . A separate sheet is provided for each of the three cercus preparations. Definitions of the column headings are provided in a fourth sheet. (XLSX) [file pone.0027873.s001.xlsx]

## Sheet: Cercus 1
x_dist	y_frac	plane_angle	cone_angle	socket_size	Hair_Length
(mm)	(-1 to 1)	(degrees)	(degrees)	(mm)	(microns)
0.0558433	-0.146928	133.614	16.3864	0.0135222	955.046
0.0649903	-0.472978	-62.6108	-147.389	0.012498	860.814
0.0783246	0.647356	110.501	-99.4986	0.00936842	572.894
0.0792648	-0.385584	119.133	30.8668	0.0143959	1035.42
0.0797376	-0.72923	-54.2807	-155.719	0.0101197	642.014
0.0824853	0.135719	55.1514	-154.849	0.0156867	1154.18
0.0846735	-0.546711	111.087	38.9129	0.0120539	819.96
0.0863843	-0.637986	-73.2892	-136.711	0.00949834	584.847
0.0886987	-0.212816	164.558	-14.5581	0.0129138	899.074
0.0975775	0.585326	76.936	-133.064	0.0109607	719.387
0.105311	-0.291733	123.726	26.2738	0.0174789	1319.06
0.115245	0.0107896	-153.05	-3.05031	0.0146625	1059.95
0.123973	0.530715	71.9085	-138.092	0.0106786	693.433
0.130116	-0.681717	-53.1788	-156.821	0.0129581	903.148
0.132198	0.276081	82.5747	-127.425	0.0198105	1533.56
0.134671	-0.0824952	-155.556	-54.4438	0.0186557	1427.33
0.144563	-0.752406	-52.7679	-157.232	0.0138684	986.89
0.148662	-0.586181	-75.6048	-134.395	0.014102	1008.38
0.149037	0.415601	93.1004	-116.9	0.0194009	1495.88
0.151664	-0.429144	127.296	22.704	0.0089216	531.787
0.157957	0.660537	79.4166	-130.583	0.0143959	1035.42
0.164926	-0.494023	-89.2025	-120.797	0.0162829	1209.03
0.176909	-0.359701	120.579	29.4208	0.0112729	748.105
0.176995	0.483857	85.9568	-124.043	0.0137451	975.548
0.183163	0.0867092	-123.704	26.2965	0.0117176	789.023
0.213405	-0.680203	-64.1507	-145.849	0.00996559	627.834
0.221687	0.556664	73.9465	-136.054	0.0134817	951.319
0.223217	0.027664	-136.778	13.2222	0.0116667	784.335
0.23741	0.620126	85.8128	-124.187	0.0117377	790.872
0.240116	-0.635281	-53.1228	-156.877	0.0148889	1080.78
0.247009	-0.58434	-38.597	-171.403	0.00914066	551.941
0.24705	0.168722	27.4154	-182.585	0.0118391	800.193
0.248407	-0.725776	-53.3401	-156.66	0.0141446	1012.31
0.25847	0.236909	60.4859	-149.514	0.0119983	814.843
0.258899	-0.0279401	-173.042	-36.9582	0.014243	1021.36
0.268471	0.344444	79.5866	-130.413	0.0120582	820.358
0.27673	-0.193977	-8.83129	158.831	0.0130939	915.634
0.28022	-0.53483	-91.761	-118.239	0.0190178	1460.64
0.288995	-0.256335	-7.53658	157.537	0.0106108	687.189
0.290954	0.672805	86.5414	-123.459	0.0168778	1263.76
0.299803	0.568139	90.625	-119.375	0.00844781	488.198
0.305466	-0.434858	109.859	40.1411	0.0218596	1722.08
0.305893	0.458959	84.8763	-125.124	0.0141517	1012.95
0.309187	0.518661	69.1005	-140.9	0.0129581	903.148
0.309534	0.401469	77.0654	-132.935	0.0123088	843.407
0.327243	-0.664044	-67.764	-142.236	0.00975305	608.281
0.346955	-0.588413	127.081	22.9188	0.0105655	683.03
0.355856	0.604562	93.4283	-116.572	0.0154163	1129.3
0.359684	-0.49609	143.576	6.42399	0.0129007	897.867
0.370732	0.293059	65.0907	-144.909	0.0149761	1088.8
0.376601	0.0652885	-17.2921	132.708	0.0195589	1510.42
0.384704	-0.128292	178.041	-28.0412	0.0198285	1535.22
0.404676	0.661116	99.1664	-110.834	0.0116104	779.159
0.406312	-0.0282495	-174.044	-35.9563	0.0165856	1236.87
0.436259	0.212181	32.3466	-177.653	0.0172247	1295.67
0.437477	-0.65284	121.076	28.9235	0.0170368	1278.38
0.438008	0.370139	72.3549	-137.645	0.0146628	1059.98
0.444637	0.447142	72.8434	-137.157	0.0146754	1061.14
0.470757	-0.230718	-12.3264	162.326	0.0189644	1455.72
0.48139	0.527803	81.7092	-128.291	0.0204257	1590.16
0.513841	-0.528251	-100.886	-109.114	0.0213815	1678.1
0.520435	0.633361	83.2285	-126.771	0.0203295	1581.31
0.524485	-0.0904732	-178.832	-31.1678	0.011341	754.369
0.525241	0.0161066	159.791	-50.209	0.0117205	789.289
0.534189	0.0752156	-174.349	-24.349	0.0116104	779.159
0.537956	-0.309327	-23.5878	173.588	0.01187	803.041
0.541781	-0.384921	152.082	-2.08238	0.0135945	961.69
0.551934	-0.604094	119.461	30.5395	0.0134924	952.303
0.56178	0.145271	0.279649	150.28	0.0147517	1068.16
0.564889	-0.166048	-28.2399	-181.76	0.0158941	1173.25
0.584046	0.563239	78.8484	-131.152	0.011876	803.592
0.593219	0.481022	85.176	-124.824	0.0131116	917.265
0.598245	0.369688	69.6524	-140.348	0.0135256	955.351
0.615395	-0.0455872	178.253	-28.2532	0.0134531	948.682
0.628089	-0.453236	126.468	23.5316	0.0161837	1199.9
0.646487	0.295559	52.4167	-157.583	0.0192193	1479.18
0.656512	-0.247779	-2.95992	152.96	0.0134531	948.682
0.660458	0.043185	171.159	-38.8414	0.0131933	924.786
0.665023	0.433115	71.6885	-138.312	0.0182425	1389.31
0.687	-0.319682	-11.8865	161.887	0.015717	1156.96
0.687496	0.647611	98.1171	-111.883	0.0136178	963.842
0.693099	-0.537618	126.188	23.812	0.0135182	954.673
0.710688	0.516509	78.7445	-131.255	0.0136614	967.847
0.716188	0.595871	93.5563	-116.444	0.0157418	1159.25
0.74822	-0.141495	-176.252	-33.748	0.0195928	1513.54
0.748581	-0.401083	147.562	2.43758	0.0186286	1424.83
0.757723	0.126509	-4.33001	145.67	0.0183998	1403.78
0.787231	-0.619149	-52.4852	-157.515	0.0177362	1342.73
0.797643	-0.0242264	-179.809	-30.191	0.0210906	1651.33
0.811814	0.378433	57.6188	-152.381	0.0140532	1003.9
0.827969	-0.51236	125.967	24.033	0.0188689	1446.94
0.852934	-0.434199	133.886	16.1144	0.0134464	948.066
0.868158	0.674377	-88.0294	61.9706	0.0235803	1880.39
0.87622	0.491542	74.2814	-135.719	0.0152583	1114.76
0.886421	0.221639	4.49716	154.497	0.0143	1026.6
0.91515	0.710909	58.9279	-151.072	0.0114778	766.959
0.916405	0.303934	1.52268	151.523	0.0130749	913.887
0.918524	-0.236616	-16.173	166.173	0.0227014	1799.53
0.919143	-0.348002	37.8045	112.196	0.0120436	819.01
0.970976	-0.0566335	-173.516	-36.4837	0.0115964	777.871
0.978542	0.590019	95.2267	-114.773	0.0196855	1522.07
0.978684	0.155327	-1.61054	148.389	0.0121583	829.562
1.00693	0.0573336	-13.2042	136.796	0.0185677	1419.23
1.02752	-0.556721	119.18	30.8204	0.0170529	1279.87
1.02893	0.684939	113.591	-96.4094	0.0138366	983.967
1.03505	0.509131	74.9122	-135.088	0.0133312	937.468
1.04964	-0.430122	110.109	39.8912	0.0215265	1691.44
1.08698	-0.151244	-2.62825	152.628	0.013129	918.865
1.09497	0.410266	58.5859	-151.414	0.0201694	1566.59
1.11346	-0.0481755	-168.158	-41.8422	0.0156023	1146.42
1.15393	0.64098	-56.0986	93.9014	0.0171008	1284.27
1.1551	0.295699	32.5921	-177.408	0.0182762	1392.41
1.18252	-0.300855	156.256	-6.25588	0.0222639	1759.28
1.19779	-0.533225	104.154	45.8463	0.0214528	1684.65
1.20292	0.515699	84.1946	-125.805	0.0222195	1755.2
1.20688	0.0391925	-178.181	-28.1813	0.0110124	724.144
1.22343	0.185209	0.44339	150.443	0.0187841	1439.14
1.26841	-0.6078	114.45	35.5504	0.0147699	1069.83
1.30787	0.348124	50.6849	-159.315	0.0138727	987.285
1.32628	-0.161114	-6.9185	156.918	0.0119678	812.041
1.33668	-0.37893	120.126	29.8739	0.013044	911.044
1.3479	0.706578	120.05	-89.9499	0.0222059	1753.94
1.3669	-0.466527	107.758	42.2423	0.0189687	1456.12
1.37919	0.0754172	175.589	-34.4107	0.0129266	900.246
1.39377	-0.0257558	-175.432	-34.5676	0.0202497	1573.97
1.42051	0.504614	131.66	-78.3405	0.01187	803.041
1.42134	0.503973	91.7865	-118.214	0.0137774	978.521
1.45336	-0.575911	102.114	47.8859	0.0187053	1431.89
1.45587	0.424586	71.7291	-138.271	0.0189971	1458.73
1.46447	0.949047	160.929	-49.071	0.0114949	768.532
1.49432	0.180153	-4.55387	145.446	0.0122904	841.716
1.49924	-0.231744	1.24216	148.758	0.0129895	906.038
1.53289	0.589519	120.142	-89.8584	0.0212654	1667.42
1.54492	0.705209	133.645	-76.355	0.0135182	954.673
1.54689	-0.746518	-173.284	-36.7163	0.0197083	1524.16
1.55063	-0.434684	101.284	48.7159	0.020974	1640.61
1.62475	0.928691	165.111	-44.8885	0.0143864	1034.55
1.63789	0.30947	48.0943	-161.906	0.0205529	1601.87
1.66184	-0.0413047	-177.287	-32.7129	0.0103225	660.669
1.67153	0.0952893	-174.026	-24.0259	0.0185731	1419.72
1.67626	-0.309633	37.9884	112.012	0.0139824	997.385
1.68688	0.741493	121.348	-88.6523	0.0188576	1445.9
1.69697	0.198724	2.10171	152.102	0.0100328	634.015
1.73519	-0.871673	160.539	-10.5394	0.0197445	1527.5
1.74096	0.445849	86.3858	-123.614	0.0195182	1506.68
1.75204	0.8254	155.035	-54.9651	0.0122657	839.443
1.76651	-0.547977	-90.8007	-119.199	0.0223168	1764.15
1.77178	0.631714	120.675	-89.3248	0.0209529	1638.67
1.80769	-0.223649	-12.5373	162.537	0.0197083	1524.16
1.81371	0.926959	161.623	-48.3773	0.016083	1190.63
1.82894	-0.400482	98.418	51.582	0.0159129	1174.99
1.85344	-0.0978766	-173.944	-36.0557	0.0208755	1631.55
1.85705	0.0499177	172.039	-37.9611	0.0138361	983.922
1.85948	0.534099	109.625	-100.375	0.0167191	1249.16
1.90153	-0.692777	-14.4459	164.446	0.0196001	1514.21
1.90314	0.194711	7.24734	157.247	0.0159129	1174.99
1.90593	-0.508655	99.8865	50.1135	0.0126179	871.846
1.921	0.683853	129.816	-80.1839	0.0115592	774.449
1.92789	-0.746246	-169.144	-40.8557	0.0213627	1676.37
1.94928	-0.807924	155.835	-5.83497	0.0213486	1675.08
1.95554	0.439334	90.6552	-119.345	0.0128051	889.071
1.97047	0.922298	159.229	-50.7708	0.0104683	674.086
1.9728	0.78481	139.459	-70.5413	0.0201363	1563.54
2.00084	0.3601	65.348	-144.652	0.0166328	1241.22
2.03936	-0.415842	101.488	48.5124	0.0206321	1609.15
2.06716	-0.87709	-32.3586	-177.641	0.0113973	759.552
2.07445	-0.217315	7.14611	142.854	0.00894425	533.871
2.08942	-0.135832	1.76383	148.236	0.00965318	599.093
2.10185	-0.526056	-87.6399	-122.36	0.0195742	1511.83
2.1057	0.543387	85.0891	-124.911	0.0231639	1842.08
2.13743	-0.292669	39.5671	110.433	0.0189306	1452.61
2.14347	0.911659	165.247	-44.7526	0.0200135	1552.24
2.17407	0.716374	137.732	-72.268	0.0242614	1943.05
2.1965	0.0792859	-14.1289	135.871	0.0194412	1499.59
2.20073	0.819278	160.15	-49.8496	0.0114949	768.532
2.22944	-0.665943	-7.12378	157.124	0.0131911	924.578
2.23094	0.214461	0.274442	150.274	0.0120998	824.185
2.23311	0.41612	68.5834	-141.417	0.0203987	1587.68
2.246	-0.430612	-79.9751	-130.025	0.0136168	963.746
2.25392	-0.122575	-11.2282	161.228	0.0122555	838.502
2.26527	-0.857178	-26.6527	-183.347	0.00994382	625.832
2.29894	0.968306	-177.935	-27.9354	0.0125329	864.024
2.32434	-0.0187075	-176.397	-33.6026	0.0119617	811.479
2.33392	0.862378	170.128	-39.8723	0.016619	1239.95
2.34232	-0.489316	80.5981	69.4019	0.0205709	1603.52
2.39037	0.0697286	-179.212	-29.2122	0.00936639	572.708
2.39091	0.749827	154.066	-55.934	0.0131998	925.385
2.39683	0.586506	135.659	-74.3409	0.0155311	1139.86
2.41596	0.421035	118.508	-91.492	0.013207	926.041
2.4169	-0.822484	174.053	-24.0528	0.014102	1008.38
2.44718	-0.180969	-9.08904	159.089	0.0210696	1649.41
2.48804	0.889285	177.852	-32.148	0.00964392	598.24
2.51398	-0.374578	88.7819	61.2181	0.0230474	1831.36
2.52945	-0.66307	-20.0443	170.044	0.020762	1621.11
2.53947	0.432674	80.49	-129.51	0.019808	1533.33
2.56444	-0.830196	178.731	-28.7308	0.00796973	444.215
2.57427	0.227933	6.67018	156.67	0.0182452	1389.56
2.59792	0.570395	123.052	-86.9484	0.0220236	1737.17
2.62243	0.939044	174.763	-35.237	0.0210641	1648.89
2.6463	0.0561161	7.70662	157.707	0.0182209	1387.32
2.65706	0.675357	146.782	-63.2183	0.0185096	1413.88
2.67045	-0.485356	-89.782	-120.218	0.0213004	1670.63
2.67994	0.805681	173.461	-36.5392	0.0214797	1687.13
2.68653	-0.765356	161.073	-11.0729	0.017959	1363.23
2.73282	-0.206449	23.5693	126.431	0.0117377	790.872
2.7911	0.606059	142.673	-67.3269	0.01223	836.158
2.79974	0.450516	76.9271	-133.073	0.0217973	1716.35
2.80514	0.1739	7.59524	157.595	0.00993715	625.218
2.8381	-0.492727	91.3351	58.6649	0.0136168	963.746
2.84387	-0.38629	92.2134	57.7866	0.0192644	1483.33
2.84719	0.317388	16.0796	166.08	0.0166406	1241.94
2.86491	0.886425	160.875	-49.1246	0.0134129	944.986
2.86507	-0.258229	42.4383	107.562	0.0199432	1545.77
2.88913	0.778749	149.582	-60.4185	0.00914066	551.941
2.90788	-0.626063	0.639375	149.361	0.00931101	567.613
2.9114	-0.728443	-141.735	-68.2651	0.0110722	729.639
2.92999	0.683461	145.078	-64.9224	0.0215741	1695.82
2.9448	0.012591	-176.94	-26.9398	0.0139736	996.573
2.9467	0.428504	84.198	-125.802	0.0114223	761.85
3.00482	-0.748958	-40.2186	-169.781	0.0161621	1197.92
3.03427	-0.193066	13.9508	136.049	0.0113535	755.523
3.04791	0.386916	99.416	-110.584	0.013914	991.087
3.07249	0.566261	131.482	-78.5179	0.0221117	1745.27
3.09589	-0.439366	80.5841	69.4159	0.0226628	1795.98
3.10164	-0.102025	-2.17843	152.178	0.0114369	763.196
3.10263	0.0417447	167.892	-42.1078	0.0102726	656.078
3.11537	0.148208	-170.661	-20.6608	0.0195486	1509.47
3.13956	-0.623747	-10.6313	160.631	0.0137413	975.199
3.17754	0.913451	-178.41	-28.4095	0.0216956	1706.99
3.2046	0.642408	142.451	-67.5494	0.0138727	987.285
3.22189	0.776407	169.91	-40.0902	0.017656	1335.35
3.23778	-0.236122	30.2034	119.797	0.0151305	1103.01
3.24938	0.427859	79.2235	-130.776	0.0196199	1516.03
3.28462	-0.13445	-3.13287	153.133	0.0141598	1013.7
3.3155	-0.727662	-169.117	-40.883	0.0148473	1076.95
3.31963	0.0209178	-177.047	-27.0467	0.0203045	1579.02
3.32215	-0.594935	14.8842	135.116	0.011451	764.493
3.35712	-0.425445	85.3829	64.6171	0.018194	1384.85
3.45463	0.410774	95.3832	-114.617	0.0136589	967.615
3.4648	-0.583962	-0.894401	150.894	0.0163131	1211.81
3.46954	0.963534	-178.047	-28.047	0.00780621	429.171
3.47268	0.579548	143.054	-66.9465	0.0206703	1612.67
3.49264	0.823127	153.064	-56.9362	0.008691	510.572
3.50923	0.702557	155.264	-54.7364	0.0212754	1668.33
3.53619	0.29927	42.527	-167.473	0.0192123	1478.53
3.5831	-0.289441	80.3218	69.6782	0.0234795	1871.11
3.60936	-0.44753	81.0432	68.9568	0.0208927	1633.13
3.6536	0.959922	165.612	-44.3883	0.020749	1619.91
3.74974	0.188353	2.4551	152.455	0.0186911	1430.58
3.75289	0.0237685	173.507	-36.4927	0.0127021	879.591
3.79771	0.457073	-108.232	41.7685	0.0209156	1635.23
3.80283	-0.609924	-5.39137	155.391	0.0131149	917.569
3.81763	0.656458	151.409	-58.5911	0.0101036	640.536
3.87887	-0.394163	75.8888	74.1112	0.0240009	1919.08
3.88627	0.21423	-125.265	24.7354	0.0103014	658.73
3.95212	-0.138022	4.46234	145.538	0.0179157	1359.25
3.96586	0.611985	146.297	-63.7032	0.0161621	1197.92
3.9773	0.186806	1.42093	151.421	0.01171	788.321
4.00186	-0.468102	66.1868	83.8132	0.00875992	516.912
4.04754	0.0107922	177.224	-32.7761	0.0168844	1264.36
4.09316	0.913153	156.787	-53.2128	0.0120641	820.901
4.09619	-0.415323	-89.3817	-120.618	0.0143013	1026.72
4.10368	0.410774	84.2199	-125.78	0.0172862	1301.33
4.10453	-0.641856	-160.926	-49.0741	0.0228966	1817.49
4.10843	0.230894	8.27137	158.271	0.0125839	868.717
4.12436	0.792102	161.089	-48.9106	0.0137026	971.635
4.13366	-0.242935	53.1508	96.8492	0.011012	724.105
4.24198	0.379371	109.851	-100.149	0.00839216	483.079
4.24261	0.820173	150.203	-59.7968	0.00727947	380.711
4.2705	0.0566904	133.276	-76.7243	0.0128651	894.589
4.28746	-0.498004	-115.361	-94.639	0.0219806	1733.22
4.28853	-0.126967	-0.775314	150.775	0.00904273	542.931
4.29836	-0.267267	36.121	113.879	0.0155694	1143.38
4.33287	-0.677636	38.0743	111.926	0.0167179	1249.04
4.33349	0.208706	-20.3288	129.671	0.00995098	626.49
4.37267	0.377831	76.2595	-133.741	0.0200135	1552.24
4.43012	0.599907	152.594	-57.406	0.0218892	1724.81
4.44327	0.830605	-175.377	-25.3767	0.0194344	1498.97
4.52164	-0.274286	44.0366	105.963	0.010407	668.446
4.57644	0.963206	162.979	-47.0208	0.0127722	886.046
4.59484	0.0775184	-16.3467	133.653	0.0194162	1497.29
4.61695	0.231568	13.7371	163.737	0.0195795	1512.32
4.62883	0.72079	168.992	-41.0085	0.0213627	1676.37
4.68184	-0.400018	76.3905	73.6095	0.0196948	1522.92
4.69179	-0.518984	48.4216	101.578	0.00726969	379.811
4.70833	0.358783	-76.2403	73.7597	0.0119533	810.708
4.71087	-0.568871	13.3169	136.683	0.0124452	855.959
4.73198	-0.123044	4.50874	145.491	0.0235638	1878.87
4.81686	0.900213	-19.9203	130.08	0.00836688	480.753
4.83265	-0.54649	11.1222	138.878	0.0068175	338.21
4.85985	-0.311158	42.2631	107.737	0.0187455	1435.58
4.88685	0.137111	-2.35892	147.641	0.0114987	768.884
4.919	0.383073	58.2762	-151.724	0.0211091	1653.04
4.93279	-0.457589	83.9588	66.0412	0.0162393	1205.02
4.96021	0.735794	160.579	-49.4207	0.00744827	396.241
4.99331	0.886146	171.937	-38.063	0.0160483	1187.45
5.00138	-0.587055	11.6543	138.346	0.017354	1307.57
5.09954	0.151663	-12.4201	137.58	0.0142705	1023.89
5.11887	0.556898	153.732	-56.2683	0.0155764	1144.03
5.19738	-0.018737	-18.1965	168.197	0.0118528	801.455

## Sheet: Cercus 2
x_dist	y_frac	plane_angle	cone_angle	socket_size	Hair_length
(mm)	(-1 to 1)	(degrees)	(degrees)	(mm)	(microns)
0.0503059	0.0542953	-70.3508	79.6492	0.00900691	539.635
0.05859	-0.160039	138.751	11.2492	0.014154	1013.17
0.070848	-0.0142804	-138.437	-71.5634	0.0153805	1126
0.0827777	-0.224082	150.036	-0.0357618	0.0144434	1039.79
0.0837217	0.133568	64.6435	-145.356	0.0174987	1320.88
0.0919828	0.349591	102.682	-107.318	0.0136209	964.124
0.0980301	-0.494027	-46.2907	-163.709	0.0135604	958.557
0.0987151	-0.494649	-62.6321	-147.368	0.0132441	929.461
0.106429	-0.416607	118.754	31.2456	0.0143614	1032.25
0.106505	-0.588883	-82.436	-127.564	0.00981769	614.228
0.114145	0.560485	57.6229	-152.377	0.00851598	494.47
0.116979	0.625451	66.9251	-143.075	0.00862006	504.045
0.121288	-0.655524	-55.4002	-154.6	0.00906836	545.29
0.121645	-0.654617	-50.9565	-159.044	0.0102826	657.002
0.122487	-0.315967	110.494	39.5057	0.0195197	1506.82
0.128834	-0.0977853	123.96	26.0396	0.0126235	872.359
0.131979	0.495483	89.0046	-120.995	0.0110642	728.909
0.133043	0.0417851	-113.684	36.3161	0.0109739	720.596
0.13916	-0.704586	126.854	23.1464	0.0108236	706.77
0.14362	0.671622	77.8676	-132.132	0.00736434	388.52
0.147135	0.27199	74.3269	-135.673	0.0184225	1405.87
0.156016	-0.806489	-59.8928	-150.107	0.00877773	518.551
0.160175	-0.605326	-81.2995	-128.7	0.0117455	791.589
0.161675	-0.0167668	-80.8406	-129.159	0.0101274	642.722
0.164686	0.407672	74.3038	-135.696	0.0192692	1483.76
0.169064	0.602682	69.9829	-140.017	0.012827	891.085
0.176124	0.748152	66.0066	-143.993	0.00880914	521.441
0.176781	-0.526201	-96.6187	-113.381	0.0172149	1294.78
0.188426	-0.746751	-65.1471	-144.853	0.00741655	393.323
0.201598	0.336465	74.7962	-135.204	0.00850129	493.118
0.208124	0.685591	84.5511	-125.449	0.0147192	1065.16
0.211586	-0.642574	-69.1311	-140.869	0.0154494	1132.34
0.216797	0.172207	-117.799	32.2011	0.0148852	1080.44
0.218816	-0.782019	-54.4684	-155.532	0.0129277	900.349
0.221709	-0.704662	-62.9028	-147.097	0.0143538	1031.55
0.239336	0.629234	80.5308	-129.469	0.00994005	625.485
0.242696	0.484878	80.6659	-129.334	0.0112381	744.905
0.243492	0.563027	66.2716	-143.728	0.00747816	398.99
0.247813	0.748525	78.4375	-131.562	0.0126111	871.221
0.268954	-0.211422	-172.009	-37.9915	0.0107706	701.899
0.269192	-0.049215	168.663	-18.6626	0.0155407	1140.75
0.270387	0.691101	70.4289	-139.571	0.00641148	300.857
0.285641	-0.685191	-25.8149	-184.185	0.0129277	900.349
0.287849	0.393705	69.8506	-140.149	0.00782359	430.77
0.295982	-0.552633	-88.6047	-121.395	0.0200168	1552.55
0.307443	-0.738682	-50.3539	-159.646	0.0177371	1342.81
0.320449	0.666162	76.6644	-133.336	0.0127489	883.895
0.321608	0.526897	70.2763	-139.724	0.0130924	915.504
0.321922	0.26866	58.9745	-151.025	0.0123372	846.025
0.323113	0.050703	152.162	-57.8375	0.020346	1582.84
0.326752	-0.447226	79.2688	70.7312	0.0202407	1573.14
0.331821	0.604527	77.0466	-132.953	0.0116175	779.811
0.333054	0.334606	-95.2041	54.7959	0.0145283	1047.6
0.341855	-0.12924	-168.48	-41.5201	0.0180905	1375.33
0.34356	-0.629834	-61.1858	-148.814	0.0175875	1329.05
0.371124	0.446115	83.5182	-126.482	0.0150304	1093.8
0.375069	-0.683794	131.032	18.9678	0.0113499	755.19
0.38778	0.704674	89.1548	-120.845	0.0153684	1124.9
0.390834	0.192531	-150.803	-0.803006	0.0157275	1157.93
0.405446	0.563815	76.8177	-133.182	0.0109014	713.928
0.406223	-0.330653	133.462	16.5383	0.0203986	1587.67
0.426615	0.375119	79.7093	-130.291	0.0136345	965.37
0.439561	-0.585935	-51.5562	-158.444	0.0105385	680.544
0.443137	0.114681	-7.93912	142.061	0.0113177	752.229
0.477904	0.429455	62.0514	-147.949	0.0099021	621.993
0.49165	-0.217106	-1.49009	151.49	0.0173423	1306.5
0.492614	-0.668926	-61.106	-148.894	0.0197211	1525.34
0.497893	-0.0121077	-170.813	-39.1874	0.0142468	1021.71
0.50392	0.271076	62.2191	-147.781	0.016231	1204.25
0.508742	0.60981	82.6641	-127.336	0.015536	1140.31
0.508785	-0.380378	153.27	-3.27034	0.0125525	865.828
0.522464	0.505974	86.514	-123.486	0.0151462	1104.45
0.5226	0.505859	82.436	-127.564	0.0205461	1601.24
0.543987	-0.44714	136.881	13.1193	0.0137103	972.349
0.544861	-0.0742915	-165.306	-44.6944	0.0124236	853.967
0.549804	0.0523301	3.43957	153.44	0.0117824	794.983
0.559399	-0.523501	-87.3124	-122.688	0.0212646	1667.35
0.587148	-0.599342	120.451	29.5488	0.0136123	963.329
0.598735	0.332753	76.9182	-133.082	0.0184303	1406.59
0.602994	0.413511	72.9508	-137.049	0.0184425	1407.71
0.603301	0.138779	-176.62	-26.62	0.0162744	1208.24
0.612348	0.564249	92.0071	-117.993	0.0103045	659.017
0.643597	-0.32097	0.0140131	149.986	0.0124597	857.296
0.645438	0.224256	10.6055	160.606	0.0117286	790.035
0.656478	-0.400665	142.706	7.2944	0.0150111	1092.02
0.672512	-0.24761	-0.170447	150.17	0.0137631	977.201
0.685502	0.0432412	-175.165	-25.1648	0.0155853	1144.85
0.699168	0.629462	91.8986	-118.101	0.0196952	1522.96
0.701846	-0.041728	-175.927	-34.073	0.0184483	1408.25
0.707056	-0.154779	-176.989	-33.0114	0.0203699	1585.04
0.723398	-0.546541	-50.2974	-159.703	0.0137064	971.987
0.727968	0.544201	72.9679	-137.032	0.0134833	951.467
0.766512	0.388031	86.4406	-123.559	0.0121508	828.875
0.768797	-0.47195	-57.0447	-152.955	0.0184164	1405.31
0.778434	0.47316	69.9644	-140.036	0.0160808	1190.44
0.792768	0.111284	-3.03908	146.961	0.0168947	1265.31
0.828249	-0.609323	-59.4398	-150.56	0.0202727	1576.09
0.833584	-0.284471	-13.556	163.556	0.0149342	1084.94
0.835099	0.233243	30.064	-179.936	0.0171362	1287.53
0.85941	-0.370552	143.94	6.0596	0.0203915	1587.02
0.88105	-0.457176	-36.3755	-173.624	0.0121048	824.637
0.889082	0.358248	55.5959	-154.404	0.0163562	1215.77
0.891828	0.641074	121.079	-88.9211	0.0123303	845.388
0.897252	-0.517925	126.198	23.8021	0.0139129	990.989
0.92555	-0.047492	14.7101	135.29	0.0127367	882.777
0.937645	0.550143	79.8803	-130.12	0.0188821	1448.15
1.01231	-0.579992	121.899	28.1012	0.0172846	1301.19
1.01374	0.448259	58.3673	-151.633	0.0183827	1402.21
1.03086	-0.227478	171.102	-21.1022	0.0208426	1628.52
1.04614	-0.430993	-77.4496	-132.55	0.0216551	1703.27
1.07741	0.0542978	-11.6603	138.34	0.0183546	1399.63
1.0815	0.237162	-19.2767	130.723	0.00950947	585.872
1.0878	-0.0519	-176.613	-33.387	0.0162393	1205.01
1.10166	0.596128	106.77	-103.23	0.0139649	995.775
1.11367	0.684165	-77.4838	72.5162	0.0221733	1750.94
1.12042	0.349223	55.6525	-154.347	0.0181462	1380.45
1.14377	-0.322267	-131.504	-78.4959	0.0134718	950.405
1.16732	0.532163	95.4648	-114.535	0.0156357	1149.49
1.20033	0.14512	1.99237	151.992	0.0134378	947.28
1.21868	-0.53665	113.658	36.3422	0.0209357	1637.08
1.26435	-0.444708	121.918	28.0817	0.0133089	935.421
1.28771	0.227114	10.6227	160.623	0.0171071	1284.86
1.29084	0.446851	71.6804	-138.32	0.0131986	925.273
1.30444	0.580088	88.2449	-121.755	0.0202847	1577.19
1.31109	-0.148701	4.66085	145.339	0.0146058	1054.74
1.33779	-0.0470808	-176.279	-33.7211	0.0171794	1291.5
1.36135	0.724775	-52.7741	97.2259	0.0110681	729.269
1.36142	0.0982207	-16.7157	133.284	0.0099151	623.189
1.38353	-0.228782	-12.6772	162.677	0.0108313	707.48
1.42315	-0.489238	106.562	43.4384	0.0196368	1517.59
1.45224	-0.397631	112.709	37.2915	0.0174547	1316.83
1.46283	0.279132	9.26081	159.261	0.0107752	702.322
1.46663	0.0574051	-174.42	-24.4198	0.0136509	966.885
1.47116	0.414311	72.9928	-137.007	0.0184359	1407.11
1.47309	-0.601375	99.5048	50.4952	0.018737	1434.81
1.48105	0.753179	110.776	-99.2242	0.0182007	1385.46
1.48591	-0.294066	153.806	-3.80553	0.0217116	1708.47
1.49404	0.503724	83.5723	-126.428	0.0207347	1618.59
1.498	0.645743	113.893	-96.1068	0.0186948	1430.92
1.55158	-0.67124	-14.2303	164.23	0.0171279	1286.76
1.57274	-0.539931	112.591	37.4092	0.0122368	836.789
1.57714	0.83289	147.992	-62.0084	0.0100765	638.036
1.58317	0.175496	11.2941	161.294	0.0183826	1402.2
1.64276	-0.93019	171.721	-21.7207	0.0168431	1260.56
1.65029	0.109276	-118.615	31.3855	0.0198389	1536.18
1.65403	0.580513	107.431	-102.569	0.0155717	1143.6
1.66433	0.693791	120.915	-89.0849	0.018941	1453.57
1.66438	-0.789387	2.51936	147.481	0.0183911	1402.99
1.69211	-0.108839	-176.015	-33.9854	0.019703	1523.68
1.703	0.790115	139.077	-70.9226	0.0181945	1384.89
1.70989	0.295026	38.7576	-171.242	0.0211198	1654.02
1.71934	0.439516	79.1588	-130.841	0.0147648	1069.36
1.72532	0.87322	160.066	-49.9342	0.013457	949.044
1.75245	-0.568651	-83.1537	-126.846	0.0180679	1373.24
1.75385	-0.403948	96.8363	53.1637	0.0212265	1663.84
1.76188	0.0395498	178.209	-31.7915	0.0145418	1048.85
1.79222	0.852857	-178.661	-28.661	0.014326	1028.99
1.79879	-0.763293	25.1911	124.809	0.00812428	458.434
1.81892	-0.887772	163.483	-13.4832	0.0199375	1545.25
1.84464	-0.479403	111.289	38.7107	0.00984277	616.535
1.87998	0.53971	89.2836	-120.716	0.0208339	1627.72
1.889	-0.19277	-2.00293	152.003	0.0180162	1368.49
1.89346	-0.714662	-10.8643	160.864	0.0197594	1528.87
1.95736	-0.41322	109.502	40.4978	0.0172149	1294.78
1.96308	0.821862	166.861	-43.1391	0.0185855	1420.87
1.97789	-0.86191	-13.8181	163.818	0.0103266	661.044
1.985	0.78671	125.446	-84.5542	0.0190733	1465.74
1.99871	-0.483457	-83.6407	-126.359	0.0183799	1401.95
2.00095	-0.991445	-174.791	-35.2095	0.0190062	1459.57
2.00137	0.413956	72.3835	-137.616	0.0174456	1316
2.0306	0.208286	12.2048	162.205	0.011104	732.564
2.03867	0.0567254	163.855	-46.1455	0.0196914	1522.61
2.08196	-0.580187	100.846	49.1542	0.01782	1350.44
2.08368	0.685966	119.912	-90.0883	0.0211572	1657.47
2.09251	-0.908549	-178.893	-31.107	0.0136461	966.444
2.10167	-0.670354	5.23788	144.762	0.00697971	353.133
2.10475	-0.266464	-153.046	-56.9542	0.0124265	854.238
2.13035	-0.79831	150.759	-0.758921	0.0205653	1603
2.13245	0.554527	113.618	-96.3818	0.0132322	928.363
2.13515	0.838226	-179.289	-29.2888	0.00730796	383.332
2.14408	-0.106046	-15.5365	165.537	0.0100647	636.955
2.1521	0.450434	75.3976	-134.602	0.0099151	623.189
2.17344	-0.47802	-72.5771	-137.423	0.0132322	928.363
2.1919	0.309335	30.5965	-179.404	0.0161281	1194.78
2.21888	0.783413	152.804	-57.1963	0.0101064	640.791
2.23184	-0.67179	2.39396	147.606	0.0130036	907.336
2.23879	-0.371421	97.905	52.095	0.0215438	1693.03
2.27643	-0.964953	-172.976	-37.0241	0.0152341	1112.54
2.27939	0.875352	173.519	-36.4814	0.0149039	1082.16
2.3116	0.0177617	-175.122	-25.1218	0.0120667	821.14
2.31686	-0.496214	87.099	62.901	0.019894	1541.25
2.31763	0.433336	86.2159	-123.784	0.0164435	1223.8
2.33771	0.201004	8.19122	158.191	0.0158605	1170.17
2.34644	0.564884	108.271	-101.729	0.0194176	1497.42
2.40979	-0.851469	175.254	-25.254	0.0102646	655.344
2.41521	-0.160071	-178.353	-31.6472	0.0191383	1471.72
2.44104	0.694249	142.459	-67.5412	0.0150814	1098.49
2.4677	0.135053	2.7898	152.79	0.0150111	1092.02
2.47768	-0.39425	100.427	49.5732	0.0155491	1141.52
2.47973	-0.667633	-20.9098	170.91	0.0201122	1561.33
2.49473	0.468373	-71.5669	78.4331	0.0114846	767.585
2.52444	-0.973465	-176.581	-33.4192	0.0196527	1519.05
2.57089	0.0319085	-179.503	-29.5033	0.018288	1393.5
2.59012	-0.816745	-19.4948	169.495	0.0117766	794.451
2.59496	-0.279812	50.524	99.476	0.018602	1422.38
2.60029	-0.462455	-92.4178	-117.582	0.0205157	1598.44
2.63708	0.447101	71.2831	-138.717	0.0198871	1540.61
2.63789	0.611376	117.191	-92.8086	0.0192752	1484.31
2.64017	0.27069	29.9375	-180.063	0.0184462	1408.05
2.69689	0.156173	-167.966	-17.9656	0.00981769	614.228
2.74368	-0.0834902	4.54968	145.45	0.0085767	500.056
2.74807	-0.174582	16.1034	133.897	0.00927089	563.922
2.75493	-0.968807	152.898	-2.89822	0.00810467	456.63
2.75568	-0.817222	-32.4934	-177.507	0.00791855	439.506
2.75921	-0.671934	-0.937052	150.937	0.00891993	531.633
2.80086	0.482409	117.626	-92.3742	0.00954257	588.917
2.81469	-0.432362	101.035	48.9646	0.0123942	851.268
2.8252	0.0324412	-173.771	-23.7708	0.011432	762.743
2.82527	-0.545452	99.6556	50.3444	0.0196793	1521.5
2.83247	-0.349617	-84.5621	-125.438	0.0209212	1635.75
2.87309	0.703967	141.798	-68.2018	0.0173727	1309.29
2.90684	-0.984695	-175.293	-34.7073	0.0133062	935.173
2.90812	0.432772	83.3686	-126.631	0.0140264	1001.43
2.93043	-0.201083	-141.581	-68.4187	0.0150526	1095.84
2.93848	0.140436	-179.38	-29.3798	0.0192728	1484.1
2.94014	-0.663215	-3.6417	153.642	0.0121771	831.292
2.9494	-0.0883719	1.22044	148.78	0.0121476	828.579
2.95523	-0.782249	161.514	-11.5143	0.0161822	1199.76
3.03705	0.901372	-158.204	-8.20433	0.00879007	519.686
3.07523	0.253702	0.988386	150.988	0.0093328	569.618
3.0807	-0.437978	89.8301	60.1699	0.021377	1677.68
3.08205	-0.0905679	145.516	4.48413	0.00739707	391.53
3.08685	0.478113	96.5143	-113.486	0.016227	1203.88
3.16225	-0.892009	-169.944	-40.0557	0.0207024	1615.62
3.16694	-0.653632	-12.6687	162.669	0.0133257	936.961
3.17653	0.755141	163.831	-46.1688	0.00950947	585.872
3.18226	-0.779421	163.878	-13.8781	0.00983182	615.527
3.18846	0.00116267	179.236	-30.7638	0.0199577	1547.11
3.23517	0.631676	-40.7953	109.205	0.0203905	1586.93
3.2544	-0.286631	86.0594	63.9406	0.0206963	1615.06
3.32812	0.213567	-7.33471	142.665	0.00931819	568.274
3.39327	-0.731452	155.481	-5.48149	0.0199953	1550.56
3.40478	-0.433601	-89.4274	-120.573	0.0149744	1088.65
3.4227	-0.0698545	150.141	-0.140815	0.00608503	270.823
3.43294	0.691802	139.255	-70.7448	0.021104	1652.57
3.43977	0.488506	82.4694	-127.531	0.0225492	1785.53
3.47895	0.284881	14.1879	164.188	0.0168189	1258.34
3.49026	0.0767261	174.491	-35.5094	0.0108364	707.953
3.49031	0.792671	-176.09	-26.0903	0.0180162	1368.49
3.56277	-0.607043	-1.22698	151.227	0.0159618	1179.49
3.62434	-0.188874	18.6903	131.31	0.010302	658.785
3.63854	-0.334107	94.2608	55.7392	0.0180761	1374
3.63933	0.453288	-29.4439	120.556	0.0105494	681.544
3.6624	0.0881247	-178.757	-28.7572	0.0128014	888.729
3.66683	-0.759995	112.251	37.7494	0.012617	871.767
3.68881	-0.444591	-99.4717	-110.528	0.0217615	1713.06
3.7461	-0.912552	-20.4585	170.458	0.0138987	989.678
3.75577	-0.596248	162.691	-12.6913	0.00893484	533.006
3.7618	-0.0957741	9.63469	140.365	0.0189984	1458.85
3.83422	0.268928	20.1647	170.165	0.0195811	1512.46
3.84512	-0.759861	139.701	10.2992	0.00896113	535.424
3.87003	-0.455548	-67.5396	-142.46	0.00922267	559.486
3.88623	0.680669	162.666	-47.3342	0.0117754	794.34
3.90838	0.0913599	-174.48	-24.4798	0.0168395	1260.23
3.90926	0.448534	87.1594	-122.841	0.0173679	1308.85
3.95665	-0.66218	144.105	5.89535	0.0202025	1569.63
4.03144	-0.392823	83.2751	66.7249	0.0228272	1811.1
4.08868	0.361406	60.0048	-149.995	0.0105494	681.544
4.12806	-0.194853	-145.344	-64.6559	0.0170148	1276.36
4.15845	-0.0703636	-6.39191	156.392	0.0108364	707.953
4.23084	0.628069	158.096	-51.904	0.0204828	1595.42
4.30246	-0.912343	162.573	-12.5729	0.0227693	1805.78
4.32934	0.254482	-10.5267	139.473	0.0122371	836.817
4.37656	0.423984	-111.395	38.6048	0.0208203	1626.47
4.38996	0.0531916	-8.14038	141.86	0.00831868	476.318
4.44418	-0.629757	160.168	-10.1678	0.0126111	871.221
4.50664	-0.77425	170.852	-20.8518	0.0159924	1182.3
4.55445	0.55583	143.157	-66.8426	0.00875513	516.472
4.55564	0.140184	166.669	-43.3311	0.020718	1617.06
4.59186	-0.451476	68.5367	81.4633	0.022261	1759.01
4.6056	-0.0439763	-176.917	-33.0827	0.0184645	1409.73
4.63985	0.251735	156.06	-53.9396	0.0100223	633.053
4.70959	0.389818	75.0132	-134.987	0.0170026	1275.24
4.71871	-0.252921	36.2707	113.729	0.0205461	1601.24
4.7244	-0.808819	-16.2983	166.298	0.00983182	615.527
4.87194	-0.632222	-3.81309	153.813	0.0176529	1335.07
4.89094	-0.37578	86.6767	63.3233	0.0177089	1340.21
4.90749	-0.0788532	-8.96139	158.961	0.00830564	475.119
4.92125	0.203984	7.55037	157.55	0.0187192	1433.17
4.95767	-0.7977	164.088	-14.0885	0.0118261	798.998
5.01588	0.0310852	172.919	-37.0806	0.0122198	835.223
5.02806	0.574131	140.385	-69.6154	0.0176207	1332.11
5.04442	0.388015	52.1644	-157.836	0.0204509	1592.48

## Sheet: Cercus 3
x_dist	y_frac	plane_angle	cone_angle	socket_size	Hair_length
(mm)	(-1 to 1)	(degrees)	(degrees)	(mm)	(microns)
1.78361	0.33916	25.0598	-184.94	0.01205	819.601
1.01918	0.130833	25.5784	-184.422	0.00819317	464.771
1.93838	0.226733	26.1511	-183.849	0.00930354	566.925
1.09557	0.311153	27.4631	-182.537	0.0139292	992.485
3.17223	0.340922	27.7011	-182.299	0.0101658	646.254
2.06155	0.326095	30.7032	-179.297	0.0129366	901.167
0.510308	0.229471	33.2559	-176.744	0.017226	1295.8
1.43318	0.329042	37.4517	-172.548	0.0165426	1232.91
0.832883	-0.335954	-38.8165	-171.184	0.0214798	1687.14
1.7597	0.467034	40.2754	-169.725	0.0126283	872.802
0.699526	0.34086	43.0878	-166.912	0.0135587	958.396
0.290906	0.185924	43.3333	-166.667	0.0148953	1081.36
0.328401	0.258978	44.9186	-165.081	0.0127309	882.243
0.296833	-0.697522	-48.4774	-161.523	0.0134923	952.294
0.548486	0.301743	49.859	-160.141	0.0120429	818.944
0.0822294	-0.241634	-51.0387	-158.961	0.0153007	1118.66
0.0468513	-0.164784	-51.2203	-158.78	0.0117788	794.646
1.21481	0.404743	51.62	-158.38	0.0165804	1236.4
0.479628	-0.629257	-52.8605	-157.14	0.0115814	776.492
0.395898	0.171424	52.8965	-157.103	0.0077136	420.651
0.138863	-0.693468	-54.5903	-155.41	0.0122189	835.142
0.20344	-0.718306	-54.6985	-155.301	0.012229	836.066
0.132662	-0.744834	-55.7944	-154.206	0.00783651	431.959
0.175137	-0.77516	-56.1464	-153.854	0.0124215	853.78
0.534338	0.372522	56.6264	-153.374	0.0167975	1256.37
0.623208	0.24926	57.3287	-152.671	0.00812335	458.348
0.579111	-0.576685	-57.9501	-152.05	0.0095738	591.79
0.310867	-0.582835	-59.602	-150.398	0.0156836	1153.89
0.393335	-0.586589	-59.638	-150.362	0.00761133	411.242
0.353041	-0.467679	-60.4531	-149.547	0.00785529	433.687
0.275941	0.635947	60.6551	-149.345	0.0137811	978.863
0.349354	0.326951	62.3336	-147.666	0.0134436	947.808
0.634071	0.542057	62.5317	-147.468	0.0118998	805.785
2.31184	-0.43299	-62.6117	-147.388	0.00918384	555.913
0.0710648	0.141284	62.8936	-147.106	0.0165457	1233.21
0.14236	0.568764	64.638	-145.362	0.00652396	311.204
0.261066	-0.301483	-64.7679	-145.232	0.0103449	662.733
0.64197	0.39402	64.9675	-145.033	0.0100355	634.269
0.425909	0.290244	65.0288	-144.971	0.00934324	570.578
0.147711	0.617387	65.3313	-144.669	0.0123697	849.014
4.78614	0.350028	65.3376	-144.662	0.0145131	1046.2
0.227459	0.250057	65.9949	-144.005	0.00896641	535.91
3.96318	0.466442	66.0008	-143.999	0.0196703	1520.66
0.170804	0.46485	66.1295	-143.87	0.00838006	481.965
0.592424	0.4533	66.3986	-143.601	0.0138258	982.971
0.214029	0.591497	66.5842	-143.416	0.0112942	750.07
0.14692	0.68129	68.109	-141.891	0.00866901	508.549
0.546255	0.622298	68.462	-141.538	0.0147194	1065.18
0.380929	-0.533058	-68.9983	-141.002	0.00776852	425.704
4.42664	0.350619	69.357	-140.643	0.0161237	1194.38
2.1635	0.410622	69.8436	-140.156	0.0189696	1456.21
0.621742	0.644636	70.3173	-139.683	0.00760948	411.072
0.116844	0.276685	70.3751	-139.625	0.015095	1099.74
1.47841	0.461423	71.3203	-138.68	0.0163684	1216.89
0.33035	0.610329	71.7208	-138.279	0.00851272	494.17
0.674789	0.496559	72.1794	-137.821	0.0109863	721.744
0.210228	-0.574502	-72.3115	-137.689	0.00965991	599.712
1.06574	0.370297	72.4203	-137.58	0.010328	661.176
0.186665	0.535684	73.0857	-136.914	0.0100141	632.299
2.32957	0.416906	73.5587	-136.441	0.013119	917.952
0.944852	0.368631	73.8847	-136.115	0.0140251	1001.31
0.47791	0.432027	73.9122	-136.088	0.00966009	599.729
1.03467	0.437761	74.4011	-135.599	0.0162011	1201.5
0.25727	0.519117	74.7275	-135.272	0.00997533	628.73
0.737644	0.470255	74.9468	-135.053	0.0105802	684.377
1.1543	0.518742	75.9954	-134.005	0.0186386	1425.75
1.99327	-0.503225	-76.6688	-133.331	0.0112901	749.689
0.275633	0.429559	77.27	-132.73	0.0120721	821.631
1.99825	0.440989	77.6906	-132.309	0.0129866	905.771
0.419183	0.500532	77.8353	-132.165	0.00927571	564.365
1.18546	0.630544	78.4221	-131.578	0.00897136	536.365
0.823472	0.34322	78.6476	-131.352	0.00894525	533.963
0.87692	0.599585	79.0682	-130.932	0.00711641	365.709
0.164538	0.39864	80.1974	-129.803	0.0132483	929.84
4.09999	0.434355	80.8413	-129.159	0.00770677	420.023
0.831341	0.54272	81.6588	-128.341	0.0166363	1241.54
0.0978218	0.200955	81.7157	-128.284	0.0073948	391.322
0.170471	0.202592	81.7256	-128.274	0.0089243	532.036
0.553656	-0.503912	-81.971	-128.029	0.0131521	920.994
0.973842	0.276029	82.1662	-127.834	0.0086184	503.893
0.52412	0.555541	82.2635	-127.736	0.0110964	731.87
3.14723	0.41975	83.0285	-126.971	0.0138586	985.991
1.30035	0.4883	83.4398	-126.56	0.0123158	844.054
0.949779	0.569747	83.9285	-126.072	0.0067697	333.812
1.91356	-0.478504	-83.9536	-126.046	0.00876074	516.988
0.190767	-0.530234	-85.9608	-124.039	0.00642942	302.507
1.04762	0.565881	86.2765	-123.723	0.0151084	1100.98
2.52191	0.280167	86.8929	-123.107	0.0225529	1785.87
4.59689	0.363968	87.8544	-122.146	0.0102026	649.635
3.08211	0.534085	88.8357	-121.164	0.020711	1616.41
0.785599	0.631844	89.0818	-120.918	0.0148412	1076.39
4.20783	0.360361	91.3611	-118.639	0.00809956	456.159
0.938535	0.47665	91.5198	-118.48	0.0108829	712.228
0.839292	0.470494	93.4668	-116.533	0.00876849	517.701
1.98434	-0.382672	-93.5386	-116.461	0.0192849	1485.22
4.51642	0.353811	94.7216	-115.278	0.00882745	523.126
2.23393	-0.376401	-95.078	-114.922	0.015801	1164.69
0.0774132	0.549472	95.5103	-114.49	0.00911377	549.467
4.68966	-0.517157	-98.0471	-111.953	0.0194659	1501.87
0.305096	-0.499003	-98.2746	-111.725	0.01667	1244.64
0.685417	0.608868	99.8427	-110.157	0.0102362	652.731
3.04252	-0.365567	-102.976	-107.024	0.0135562	958.166
0.120222	-0.594971	-103.06	-106.94	0.0132335	928.482
3.24844	-0.428158	-103.323	-106.677	0.0144739	1042.6
1.04653	0.667644	105.762	-104.238	0.0178374	1352.04
1.66441	0.589491	105.806	-104.194	0.00993827	625.321
2.78	0.506098	110.083	-99.9175	0.0116996	787.363
1.5463	0.593156	111.898	-98.1021	0.0191451	1472.35
1.37984	0.689552	113.099	-96.9015	0.0168061	1257.16
1.07965	0.748731	113.644	-96.3556	0.0077136	420.651
1.32731	0.60873	113.792	-96.208	0.0155761	1144
2.07578	0.824454	115.732	-94.2676	0.00854727	497.348
3.41745	0.515281	117.244	-92.7558	0.00888253	528.193
1.95271	0.630436	117.358	-92.642	0.00845882	489.212
1.83351	0.613771	119.06	-90.9402	0.0210082	1643.76
1.61684	0.707974	120.89	-89.1102	0.0198266	1535.05
1.15066	0.714859	123.156	-86.8439	0.00943022	578.58
0.808665	0.694503	123.709	-86.2913	0.00832108	476.54
2.75296	0.63259	126.223	-83.7771	0.0202867	1577.38
1.23604	0.718007	127.343	-82.6575	0.0100158	632.45
1.56719	0.832924	128.181	-81.8187	0.01089	712.88
0.934659	0.728203	128.273	-81.7268	0.00805343	451.916
2.39398	0.860878	129.463	-80.5369	0.010225	651.7
1.93252	0.521995	131.169	-78.8311	0.0100256	633.352
2.50743	0.60326	132.952	-77.0476	0.0163627	1216.36
0.895527	0.660689	133.155	-76.8446	0.0102533	654.301
2.51658	0.70503	133.662	-76.3381	0.0126505	874.845
2.06556	0.718845	134.222	-75.7782	0.0198644	1538.53
2.88147	0.586814	135.07	-74.9299	0.0102798	656.738
4.01382	0.670104	135.681	-74.3191	0.0181707	1382.7
3.33096	0.602207	136.082	-73.9175	0.0124966	860.69
2.44321	0.771921	136.798	-73.2022	0.00941153	576.861
1.46653	0.771975	138.048	-71.952	0.0142896	1025.65
2.35702	0.633575	138.807	-71.1928	0.0106031	686.486
1.32338	0.771947	140.324	-69.6765	0.00861861	503.912
2.10409	0.932828	141.123	-68.8767	0.00751591	402.464
3.16804	0.71012	141.921	-68.0789	0.0176046	1330.63
1.2661	0.856966	143.49	-66.5099	0.00981927	614.373
4.46551	0.55771	143.981	-66.0189	0.016688	1246.3
3.61012	0.638548	144.596	-65.4036	0.0173709	1309.13
1.77521	0.782949	144.954	-65.0455	0.017106	1284.75
3.66176	-0.146613	-145.37	-64.6303	0.00739195	391.06
3.43703	0.696556	146.435	-63.5646	0.0143289	1029.26
2.95721	0.718798	147.421	-62.5794	0.00936306	572.401
1.19289	0.791071	149.541	-60.459	0.00922627	559.817
4.63116	0.538721	154.044	-55.9563	0.00915411	553.178
0.274856	-0.032773	-158.111	-51.889	0.014097	1007.92
1.96031	0.891923	159.18	-50.8195	0.016078	1190.18
0.98138	-0.0623434	-159.717	-50.2831	0.0110431	726.966
0.472015	-0.287965	-159.917	-50.0828	0.0100865	638.954
4.73636	0.645199	160.345	-49.655	0.00888364	528.295
1.6657	0.89989	160.848	-49.1523	0.00829144	473.812
2.26181	0.900115	161.907	-48.0932	0.011432	762.741
3.11247	0.150848	164.103	-45.8967	0.00961428	595.514
0.107427	-0.0871358	-164.899	-45.1007	0.0166715	1244.78
0.343839	-0.116278	-165.513	-44.487	0.016949	1270.3
4.44342	0.0200072	165.584	-44.4156	0.0139125	990.951
2.79586	-0.794295	-165.966	-44.0336	0.00909257	547.517
2.16671	0.991694	166.106	-43.8942	0.00688177	344.123
2.9755	0.863635	166.795	-43.2054	0.00997533	628.73
1.77276	-0.104243	-167.435	-42.5651	0.0183499	1399.19
0.517426	-0.0684821	-169.304	-40.6958	0.0131568	921.424
2.2691	0.779665	169.352	-40.6475	0.0151741	1107.02
2.84822	0.900603	170.154	-39.846	0.00927703	564.487
1.75604	0.908219	170.949	-39.0513	0.0105073	677.667
3.73868	-0.0334079	-171.594	-38.4063	0.017812	1349.7
2.85364	0.270346	172.132	-37.8679	0.0110789	730.259
4.20469	0.0453436	173.429	-36.571	0.0132476	929.782
0.665633	0.0688438	174.084	-35.9162	0.0110958	731.812
0.678795	-0.0420672	-174.938	-35.0621	0.0108265	707.038
1.88664	-0.77381	-175.153	-34.8471	0.0184737	1410.58
2.66366	0.800966	175.316	-34.6842	0.0154014	1127.93
4.15911	0.819027	175.424	-34.5758	0.0160132	1184.21
2.88012	-0.787759	-175.782	-34.2184	0.0116922	786.683
0.69982	0.0204285	175.786	-34.2135	0.00681054	337.569
1.42035	0.892168	175.863	-34.137	0.0089243	532.036
2.74085	0.143998	176.058	-33.9418	0.0151461	1104.44
1.77256	0.976915	176.371	-33.6285	0.0089376	533.259
3.94211	0.977155	176.373	-33.6271	0.0101479	644.607
1.11554	-0.0106555	-176.881	-33.1192	0.0154588	1133.21
0.711926	-0.124033	-176.931	-33.069	0.0173978	1311.59
1.56897	-0.0221541	-177.084	-32.9156	0.00851559	494.435
4.62089	0.00708173	177.202	-32.7978	0.0133231	936.728
4.45323	0.708834	177.467	-32.5326	0.0132483	929.84
1.98221	0.0387623	177.874	-32.1261	0.0148915	1081.02
2.45478	0.931808	178.064	-31.936	0.00892954	532.518
3.08678	-0.0660409	-178.56	-31.4396	0.00941352	577.043
1.59031	0.941454	178.58	-31.4203	0.0144833	1043.47
0.829632	0.0788212	178.588	-31.4116	0.0139682	996.072
2.63938	0.919379	178.87	-31.1298	0.0184965	1412.68
4.29971	0.919638	179.022	-30.9782	0.0234267	1866.25
3.42375	-0.728119	-179.509	-30.4906	0.0123966	851.491
2.7074	0.0508018	179.636	-30.3635	0.00997328	628.542
0.81894	-0.0162595	-179.654	-30.3461	0.0178097	1349.49
3.87259	0.823797	-179.678	-29.6782	0.010812	705.706
3.69222	0.837297	-179.308	-29.3083	0.0170131	1276.2
3.47259	0.161135	-178.715	-28.7151	0.0181134	1377.43
3.13865	0.91079	-177.86	-27.8598	0.00866854	508.506
4.30676	0.62828	-177.64	-27.6397	0.00870483	511.844
0.210779	-0.106066	175.82	-25.8205	0.00898596	537.708
3.2359	0.809495	-175.723	-25.7227	0.0158857	1172.49
1.49143	0.0968236	-175.485	-25.4847	0.0132907	933.748
2.96544	0.0384384	-175.223	-25.2231	0.0177673	1345.59
2.15556	-0.0390324	175.005	-25.0053	0.0111301	734.969
2.54621	-0.00398682	174.969	-24.9694	0.0117399	791.073
2.64608	0.189252	-174.801	-24.8007	0.00919364	556.815
1.61827	0.0515202	-174.732	-24.7323	0.00986129	618.239
4.49353	-0.704288	174.658	-24.6581	0.00840207	483.991
4.16198	0.944853	-174.643	-24.6435	0.00967322	600.937
3.22627	-0.756366	174.435	-24.4353	0.00840402	484.17
3.32088	0.0227626	-173.674	-23.6739	0.0102362	652.731
3.57516	-0.772707	172.814	-22.8141	0.0102362	652.731
0.525612	0.0806947	-172.517	-22.5171	0.00866901	508.549
1.89041	-0.698831	172.432	-22.4316	0.0110504	727.638
0.42932	-0.00456478	172.062	-22.0623	0.0110964	731.87
0.330595	-0.201513	171.774	-21.7741	0.0141777	1015.35
4.0825	-0.0734246	170.069	-20.0695	0.0086184	503.893
0.154398	-0.162073	169.538	-19.5376	0.0126217	872.196
0.226727	-0.254423	168.983	-18.9835	0.0110789	730.259
3.1446	-0.750303	168.718	-18.7177	0.00647103	306.335
1.65595	-0.00617517	168.693	-18.6927	0.00984675	616.901
0.577902	0.00260731	-167.866	-17.8664	0.0175526	1325.84
1.82023	-0.714806	167.482	-17.4816	0.00808423	454.75
1.82371	0.0975334	-167.281	-17.2809	0.0175402	1324.7
2.64956	-0.757584	165.964	-15.9645	0.0169309	1268.64
3.9491	0.0501341	-165.772	-15.7721	0.0100732	637.731
3.01649	-0.738847	164.046	-14.0457	0.0172609	1299.01
0.601433	-0.361907	163.73	-13.7301	0.0114217	761.799
0.229483	-0.162674	162.64	-12.6405	0.00775677	424.623
0.991624	0.0567792	-161.791	-11.7908	0.0107371	698.81
2.4952	0.104896	-155.795	-5.79522	0.00845882	489.212
4.63091	-0.742056	155.14	-5.13958	0.0194509	1500.48
2.53818	0.907775	-153.109	-3.10871	0.00897775	536.953
2.12294	0.0833166	-152.459	-2.45905	0.0103449	662.733
2.79064	0.294914	-148.506	1.49393	0.0107288	698.048
3.66604	0.476063	-148.43	1.57043	0.0109675	720.009
0.16736	0.0423816	-143.075	6.92519	0.0106763	693.222
1.67993	0.995035	-142.363	7.63694	0.0098216	614.587
0.233522	-0.369767	136.258	13.7418	0.0116097	779.091
0.489754	-0.417239	133.4	16.5997	0.0108426	708.523
0.0506277	0.000536909	-131.726	18.2743	0.0138373	984.029
0.470472	-0.34889	130.124	19.8756	0.0148953	1081.36
1.4963	-0.287754	127.157	22.8432	0.0185402	1416.7
0.186386	-0.200872	125.426	24.5738	0.0115322	771.958
0.846486	-0.486103	121.854	28.1457	0.0167697	1253.81
0.138423	-0.323641	119.05	30.9501	0.0165941	1237.66
1.68843	-0.248438	118.612	31.3876	0.00918205	555.748
0.474423	-0.556184	115.823	34.1774	0.0118188	798.326
1.27032	-0.487478	115.149	34.8509	0.0101008	640.27
0.0644756	0.0703561	-115.002	34.9984	0.00896275	535.573
0.872434	-0.411105	113.899	36.1014	0.0136692	968.569
0.750405	-0.449176	112.281	37.7186	0.0130668	913.143
2.71534	-0.64527	111.845	38.1554	0.0064133	301.024
0.0992421	-0.661051	110.637	39.363	0.0115313	771.883
1.57726	-0.595733	108.95	41.0497	0.0087055	511.906
1.28243	-0.579662	108.891	41.1087	0.0105073	677.667
0.241358	0.472844	-107.951	42.049	0.0125592	866.445
0.0881621	0.638123	-107.939	42.0606	0.00725484	378.445
0.291611	0.565924	-107.087	42.913	0.0112995	750.556
0.370971	0.416389	-106.444	43.5556	0.013119	917.952
1.0147	-0.425051	106.187	43.8134	0.0188689	1446.93
0.747591	-0.51091	105.917	44.0826	0.0083972	483.542
1.44132	-0.708771	104.687	45.313	0.00840889	484.618
0.0476435	0.510616	-104.594	45.4065	0.00870671	512.017
0.796903	-0.577571	104.229	45.7713	0.0121107	825.186
0.393621	0.574215	-103.989	46.0105	0.0133752	941.516
2.44057	-0.5297	103.897	46.1032	0.00963566	597.481
0.0732866	0.603199	-103.173	46.8275	0.00962747	596.728
0.194414	0.646618	-103.092	46.9078	0.00714977	368.779
3.48727	0.447038	-103.046	46.9539	0.019828	1535.18
0.623104	-0.427621	102.014	47.9858	0.0158484	1169.06
1.01192	-0.598397	101.707	48.2932	0.00881909	522.357
1.40345	-0.385468	100.878	49.1222	0.0183499	1399.19
0.202793	0.32855	-99.9919	50.0081	0.0141777	1015.35
2.43514	-0.424139	99.9842	50.0158	0.0156089	1147.02
0.417252	0.633078	-99.8107	50.1893	0.0129611	903.419
0.987518	-0.54035	99.3342	50.6658	0.0122847	841.189
1.81665	-0.551982	99.1864	50.8136	0.0189332	1452.85
1.15486	-0.520113	99.0138	50.9862	0.0191999	1477.39
1.62977	-0.434748	97.5609	52.4391	0.0183037	1394.94
0.0777167	0.679018	-97.537	52.463	0.00862431	504.436
2.89165	0.416657	-96.9901	53.0099	0.0110789	730.259
1.82909	-0.438318	96.2859	53.7141	0.0165541	1233.98
0.664917	-0.53853	96.1818	53.8182	0.0123571	847.857
1.66203	-0.545749	96.1385	53.8615	0.0123571	847.857
3.81877	0.616457	-94.3322	55.6678	0.0120138	816.269
1.4084	-0.585184	93.7558	56.2442	0.0202513	1574.12
0.45696	0.570226	-93.597	56.403	0.00740169	391.955
3.22755	-0.354286	90.8354	59.1646	0.00851272	494.17
0.43745	-0.46396	90.0887	59.9113	0.0129213	899.761
2.09805	-0.561216	88.4336	61.5664	0.0156918	1154.65
1.37034	-0.491126	87.8027	62.1973	0.0156371	1149.62
1.13272	-0.604689	87.7738	62.2262	0.0178781	1355.78
2.56649	-0.530114	83.5608	66.4392	0.0170315	1277.9
2.63073	-0.463785	83.4869	66.5131	0.00927703	564.487
1.52068	-0.516005	83.0362	66.9638	0.0188704	1447.07
2.7862	-0.422084	82.3188	67.6812	0.0203809	1586.04
0.0259394	-0.109082	81.2783	68.7217	0.0123196	844.403
2.76677	-0.319124	80.4612	69.5388	0.0187896	1439.64
4.45741	-0.409802	80.1587	69.8413	0.0166363	1241.54
3.06725	-0.464808	77.7211	72.2789	0.0200165	1552.52
2.19562	-0.492052	77.5577	72.4423	0.0190855	1466.87
4.09728	-0.414318	76.0535	73.9465	0.0181786	1383.43
2.80394	-0.636214	72.7768	77.2232	0.00895852	535.183
3.85406	-0.472518	68.3837	81.6163	0.0190293	1461.69
3.45427	-0.439931	68.2538	81.7462	0.0203018	1578.76
3.37452	-0.286472	66.459	83.541	0.0201761	1567.21
1.719	-0.482709	61.631	88.369	0.0112062	741.969
1.8967	0.790607	-54.4214	95.5786	0.00807714	454.097
1.84639	0.706736	-50.2496	99.7504	0.0130723	913.65
3.9619	-0.126519	48.2504	101.75	0.0111999	741.387
3.80739	-0.216288	47.6366	102.363	0.00939797	575.613
2.94456	-0.47356	46.093	103.907	0.00939797	575.613
3.60711	-0.438806	44.8489	105.151	0.0073448	386.722
2.54035	-0.283418	44.552	105.448	0.0175077	1321.71
1.2639	-0.389645	44.0052	105.995	0.00930705	567.249
1.94443	-0.198137	41.7572	108.243	0.0101008	640.27
0.99634	-0.314782	37.5882	112.412	0.00937997	573.957
4.35719	-0.530005	32.33	117.67	0.010439	671.39
1.20557	-0.301848	32.0724	117.928	0.0152415	1113.21
2.10393	-0.221226	31.3388	118.661	0.00871932	513.178
3.99582	-0.507478	31.2552	118.745	0.0102438	653.43
4.1546	-0.255443	31.101	118.899	0.0174297	1314.53
2.2314	-0.250642	30.8986	119.101	0.0161337	1195.3
4.78727	-0.288868	28.2151	121.785	0.0111593	737.653
3.09722	-0.194676	27.9673	122.033	0.0138066	981.203
3.74697	-0.358389	27.798	122.202	0.0111593	737.653
1.82968	-0.272703	24.8699	125.13	0.0125593	866.457
2.58021	-0.0995548	24.2728	125.727	0.00820067	465.461
2.31077	-0.179928	24.2486	125.751	0.00861861	503.912
1.09145	-0.287065	22.4586	127.541	0.0111068	732.83
2.73068	-0.13727	21.1527	128.847	0.0176825	1337.79
2.2504	-0.728709	20.7973	129.203	0.0102362	652.731
2.41967	-0.200302	20.6028	129.397	0.00829588	474.221
2.01714	-0.0997654	19.7039	130.296	0.00993097	624.649
1.84705	-0.707887	19.1149	130.885	0.0113515	755.34
2.32533	0.0843146	-17.108	132.892	0.0174115	1312.86
4.08391	0.24923	-13.3912	136.609	0.00989918	621.724
1.12797	-0.11666	11.0639	138.936	0.0118874	804.644
2.16656	-0.706312	10.1848	139.815	0.00711525	365.603
4.50282	0.20093	-9.90889	140.091	0.0107906	703.739
2.01229	-0.708446	9.87343	140.127	0.015145	1104.34
0.360723	-0.281378	9.20705	140.793	0.0114928	768.336
4.32375	-0.169129	8.56243	141.438	0.0179137	1359.06
4.87422	0.210201	-8.22879	141.771	0.0073815	390.098
3.91906	0.250759	-7.98545	142.015	0.0101612	645.83
3.52601	-0.0694992	7.17567	142.824	0.00837614	481.605
1.52437	-0.129298	5.89017	144.11	0.00994203	625.667
3.85585	-0.645952	5.69508	144.305	0.00847105	490.336
4.1629	-0.668881	5.46712	144.533	0.00945091	580.484
0.287438	0.118086	-5.26118	144.739	0.0101804	647.598
3.5432	-0.613814	4.68479	145.315	0.0100188	632.729
0.432299	-0.212721	4.4634	145.537	0.010531	679.856
1.67765	-0.716168	4.3675	145.632	0.0197634	1529.24
4.73899	0.15601	-4.23095	145.769	0.0123509	847.286
1.3818	-0.15399	2.83199	147.168	0.0161366	1195.57
1.98247	-0.679795	2.70333	147.297	0.00768953	418.437
3.51582	0.855656	-2.57822	147.422	0.00986005	618.124
2.38491	-0.114845	1.45251	148.547	0.0106866	694.163
3.71382	0.286572	-1.18501	148.815	0.0161196	1194
1.65334	0.13447	0.00576067	150.006	0.00809956	456.159
1.15474	0.0993074	0.0635101	150.064	0.0158878	1172.68
1.58868	0.195869	0.305012	150.305	0.0165055	1229.51
1.22674	-0.220698	-1.07679	151.077	0.0109305	716.603
3.35753	-0.0966219	-1.42062	151.421	0.0143274	1029.12
1.71794	0.20971	1.9021	151.902	0.00876849	517.701
0.838564	0.156913	2.11342	152.113	0.0166058	1238.73
3.028	0.232782	2.30044	152.3	0.0153338	1121.71
2.17461	-0.118075	-2.33815	152.338	0.011184	739.926
4.39712	0.183324	2.42485	152.425	0.00815138	460.927
4.294	-0.655176	-3.25028	153.25	0.0122016	833.551
3.26116	0.255088	3.82528	153.825	0.00755403	405.97
3.56699	0.269829	3.83246	153.832	0.00911377	549.467
4.59229	-0.142723	-3.95585	153.956	0.00836447	480.532
1.59282	0.293479	4.24266	154.243	0.0103871	666.615
4.81882	-0.167155	-4.29953	154.3	0.011465	765.782
4.13825	-0.157351	-5.79333	155.793	0.00772603	421.795
4.81763	-0.000225705	-5.93909	155.939	0.00987427	619.433
2.13668	-0.686466	-5.9763	155.976	0.00931271	567.769
0.740824	-0.233451	-6.40229	156.402	0.0117267	789.853
3.54131	0.0438334	6.68341	156.683	0.00897554	536.75
2.50779	-0.800745	-7.42804	157.428	0.0102346	652.584
3.73948	-0.577947	-7.9471	157.947	0.0105073	677.667
3.00229	-0.616569	-8.1066	158.107	0.0105084	677.775
4.60856	-0.23829	-8.44421	158.444	0.00708221	362.563
0.623206	-0.198814	-8.65009	158.65	0.00862383	504.392
0.937366	-0.216896	-8.794	158.794	0.0175534	1325.91
0.525729	-0.151822	-8.97811	158.978	0.0123196	844.403
2.48799	-0.709851	-9.20665	159.207	0.00772496	421.697
2.37317	-0.705545	-10.0174	160.017	0.0140352	1002.24
0.662823	-0.295923	-10.0796	160.08	0.0147795	1070.71
4.72207	-0.128737	-10.2624	160.262	0.0101612	645.83
2.3414	-0.661503	-10.6839	160.684	0.0126365	873.56
1.81437	0.205958	10.7356	160.736	0.0104225	669.873
3.31299	-0.631288	-10.8042	160.804	0.0144839	1043.52
0.186209	-0.632557	-11.6609	161.661	0.0107906	703.739
0.673313	0.208857	11.7583	161.758	0.010813	705.795
2.27307	0.264463	11.7954	161.795	0.00915411	553.178
0.614161	0.135939	11.8681	161.868	0.0131521	920.994
4.00371	-0.637468	-12.3158	162.316	0.0175454	1325.17
2.40003	0.207347	12.9847	162.985	0.0118998	805.785
3.18602	-0.638564	-13.3214	163.321	0.0061579	277.527
0.545273	-0.238387	-13.3939	163.394	0.0144839	1043.52
1.35671	0.172181	13.9196	163.92	0.0113194	752.387
0.458164	0.146248	16.0226	166.023	0.0125394	864.627
3.4219	0.286186	17.4072	167.407	0.0115662	775.088
2.09237	0.224291	17.5225	167.523	0.0170727	1281.69
1.16662	0.234305	19.0616	169.062	0.0134966	952.685
1.99158	0.176515	19.8585	169.858	0.00909257	547.517
2.2085	0.166114	21.5076	171.508	0.00922995	560.155
0.735788	0.133739	22.2033	172.203	0.00717582	371.175
0.98945	0.210234	24.1463	174.146	0.010929	716.466

## Sheet: Definitions
x_dist	Distance of the socket from the base of the cercus
y_frac	Fractional distance around the cercus, with 0 set to the lateral longitudinal midline (solid lines in Fig. 8) and +- 1 set to the medial midline (Dashed lines in Fig. 8).
plane_angle	Excitatory hair movement direction in the cartesian coordinates directly from the tissue collages, corrected for 30 degree rotation of the cercus with respect to the animal's body.
cone_angle	Excitatory hair movement direction in the natural conical coordinates of the cerci, corrected for 30 degree rotation of the cercus with respect to the animal's body, and corrected for the "wrap around" of the upper and lower surfaces of the cerci.
socket_size	Diameter of the long axis of the socket septum.
Hair_length	Length of the filiform hair, calculated from "socket_size" the relations presented in figure 6.
Colors:	The colors of the 3 different data sets correspond to the color scheme used in the figures.
